# Supplementary material for: Surface reconstructing hierarchical structures as robust sulfion oxidation catalysts to produce hydrogen with ultralow energy consumption
Source: Royal Society of Chemistry journal article supplement (doi:10.1039/d2qi02629e), 2023-01-01
Supplement: d2qi02629e1.pdf [file d2qi02629e1.pdf]

## Supporting information

### **Surface reconstructing hierarchical structures as robust sulfion oxidation catalysts to produce hydrogen with ultralow energy consumption**

Taotao Gao,<sup>a</sup> Xiangmin Tang,<sup>b</sup> Xiaoqin Li,<sup>a</sup> Hai Lan,<sup>c</sup> Shumin Yu,<sup>b</sup> Shuaiwei Wu,<sup>b</sup> Qu Yue<sup>\*a</sup> and Dan Xiao<sup>\*a,d</sup>

<sup>a</sup> Institute for Advanced Study, Chengdu University, Chengdu, 610106, P. R. China,

E-mail: [xiaodan@scu.edu.cn](mailto:xiaodan@scu.edu.cn), [yuequ@cdu.edu.cn](mailto:yuequ@cdu.edu.cn)

<sup>b</sup> School of Mechanical Engineering, Chengdu University, Chengdu, 610106, P. R. China.

<sup>c</sup> College of Materials Science and Engineering, Chongqing Jiaotong University, Chongqing, 400074, P. R. China.

<sup>d</sup> College of Chemical Engineering, Sichuan University, Chengdu, 610065, P. R. China.

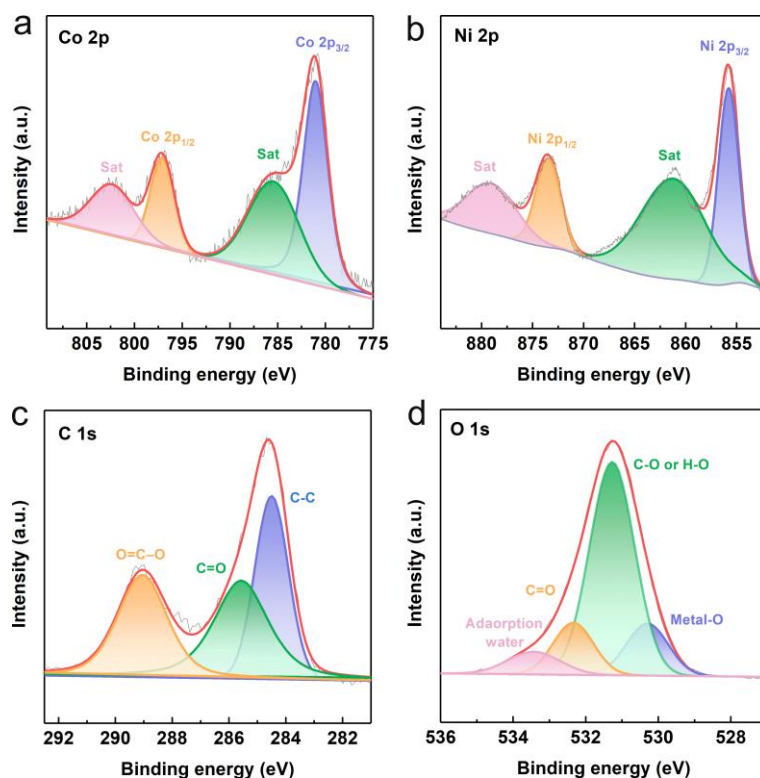

**Fig. S1.** The (a) Co 2p, (b) Ni 2p, (c) C1s and (d) O1s spectra of Ni-Co-C/NF.

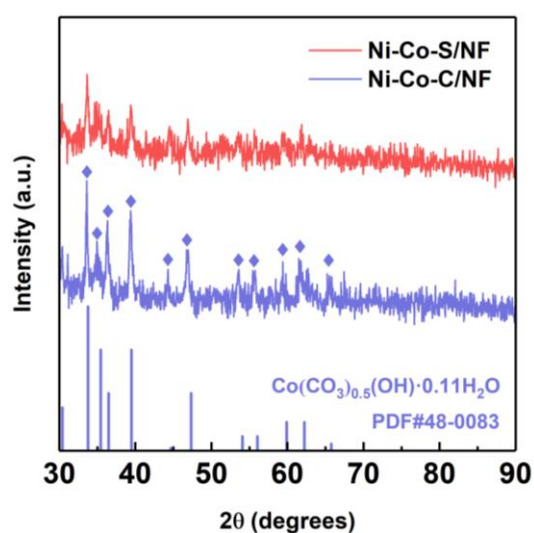

**Fig. S2.** XRD patterns of the powder samples scraped from Ni-Co-C/NF and Ni-Co-S/NF, respectively.

**Table S1.** Ni, Co and S contents in Ni-Co-C/NF and Ni-Co-S/NF based on the ICP-AES experiment.

| Samples    | Ni (wt.%) | Co (wt.%) | S (wt.%) |
|------------|-----------|-----------|----------|
| Ni-Co-C/NF | 5.9       | 51.5      | 0.0      |
| Ni-Co-S/NF | 4.3       | 38.8      | 5.3      |

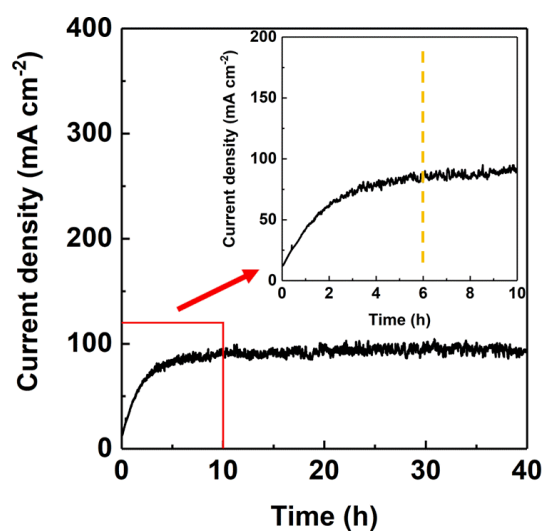

**Fig. S3.** The I-t curve during the activation process of Ni-Co-C/NF at the potential of 0.35 V vs. RHE.

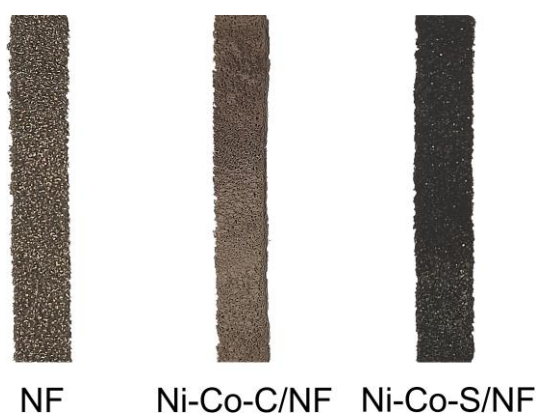

**Fig. S4.** Images of NF (silver gray), Ni-Co-C/NF (pink) and Ni-Co-S/NF (black), respectively.

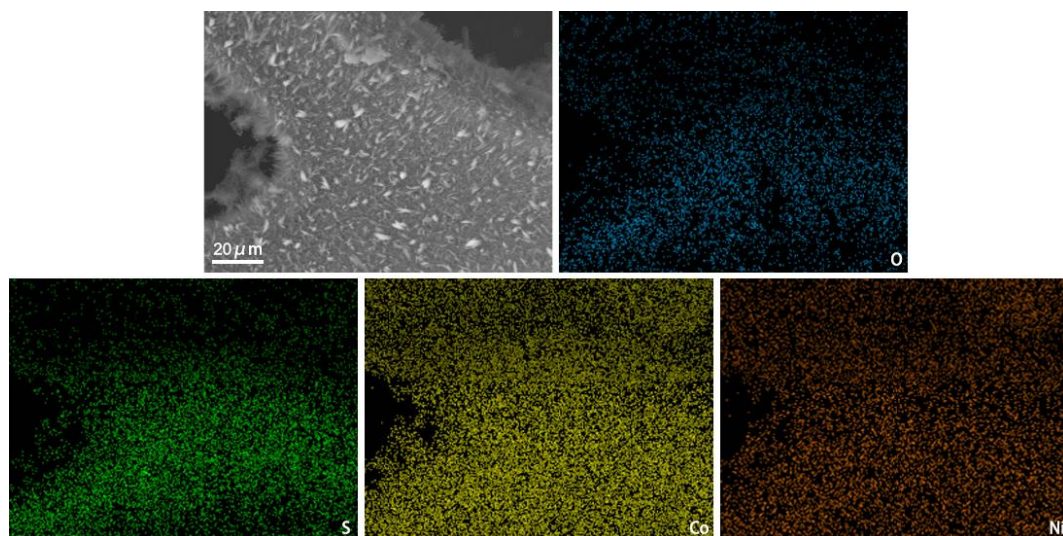

**Fig. S5.** SEM image of Ni-Co-S/NF and the element mapping of O, S, Co and Ni respectively.

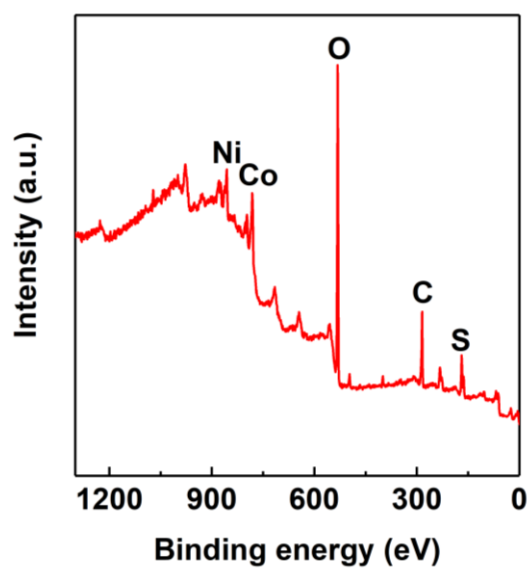

**Fig. S6.** The XPS full spectrum of Ni-Co-S/NF.

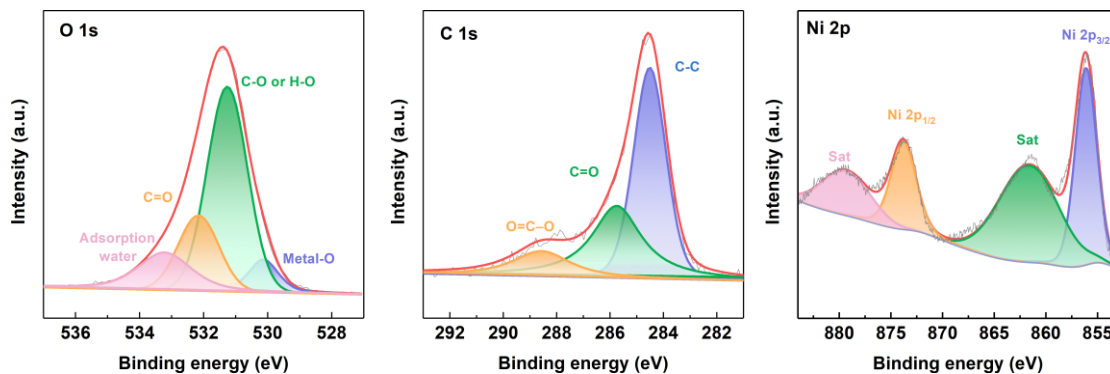

**Fig. S7.** The O 1s, C 1s and Ni 2p spectra of Ni-Co-S/NF.

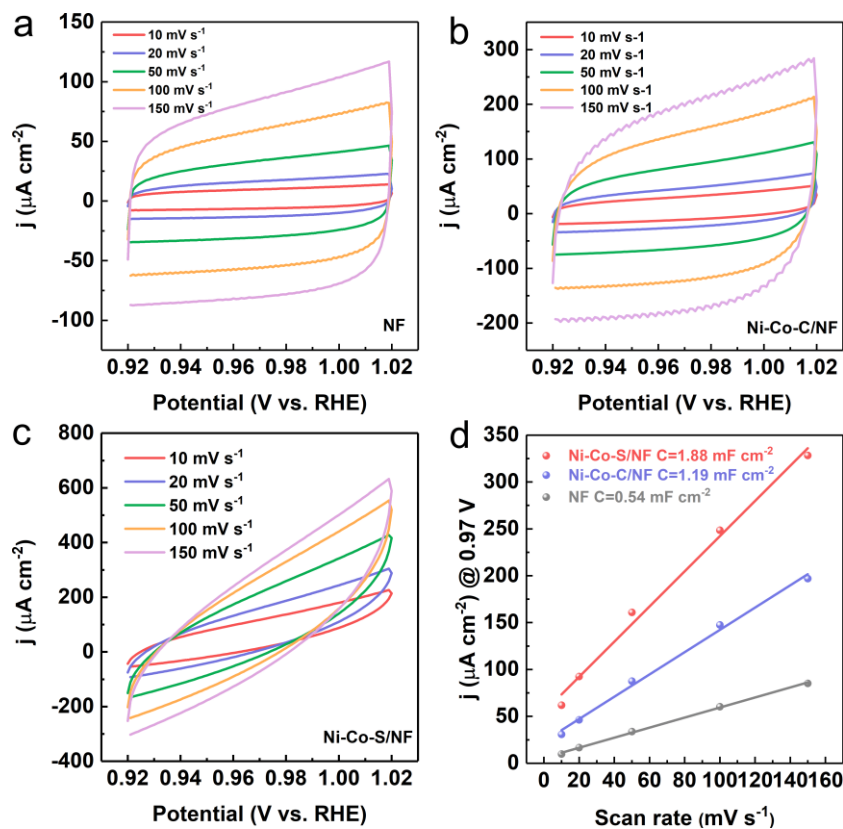

**Fig. S8.** The double-layer capacitance measurements of the electrodes; a-c) the cyclic voltammograms of the catalysts at a series of scan rates of 10, 20, 50, 100 and 150 mV s<sup>-1</sup> from 0.92 to 1.02 V vs. RHE in 1 M NaOH; d) the linear fitting of the oxidation currents of the catalysts at 0.97 V vs. RHE versus scan rates.

Electrical double-layer capacitance measurements were used to determine the electrochemical active surface area (ECSA) of the catalysts. According to Fig. S8d, the electrical double-layer capacitance could be obtained based on the specific capacitance value of a smooth standard with a real surface area of 1 cm<sup>2</sup>. 40 uF cm<sup>-2</sup> is considered as the value of specific capacitance for a smooth standard with a real surface area of 1 cm<sup>2</sup> based on previous studies.

The electrochemical active surface area could be obtained via the following equation:

$$A_{\text{ECSA}} = \frac{\text{The electrical double-layer capacitor}}{40}$$

For example:

$$\text{Ni-Co-S/NF: } A_{\text{ECSA}} = \frac{1880}{40} = 47.00 \text{ cm}^2_{\text{ECSA}}$$

**Table S2.** The calculated ECSA of the obtained electrodes.

| Electrodes | C (mF cm <sup>-2</sup> ) | ESCA (cm <sup>2</sup> ) |
|------------|--------------------------|-------------------------|
| NF         | 0.54                     | 11.25                   |
| Ni-Co-C/NF | 1.19                     | 29.75                   |
| Ni-Co-S/NF | 1.88                     | 47.00                   |

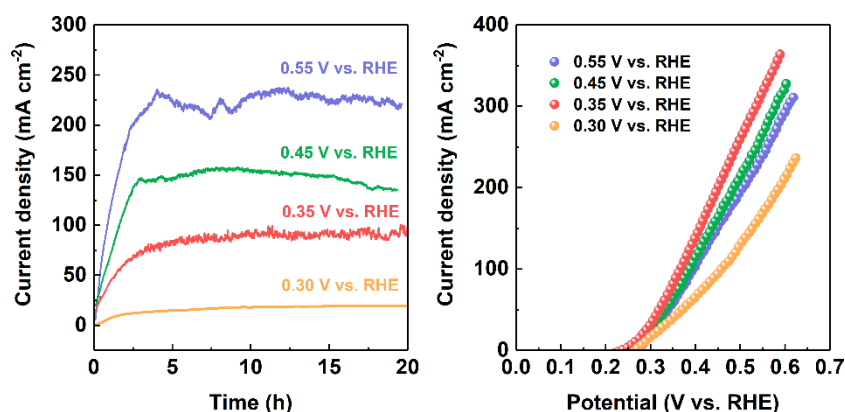

**Fig. S9.** (a) I-t curves of the Ni-Co-C/NF electrodes at different activation potentials and (b) polarization curves of the corresponding Ni-Co-C/NF electrodes.

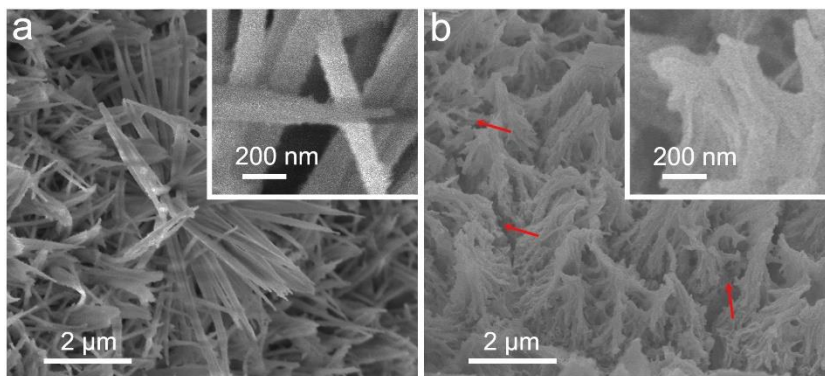

**Fig. S10** SEM images of the Ni-Co-S/NF electrodes activated at the potentials of (a) 0.30 V vs. RHE and (b) 0.45 V vs. RHE, respectively.

The different activation potentials would result in differences in morphology and structure, which is closely related to electrochemical performance.<sup>1</sup> Therefore, the SEM test of the Ni-Co-S/NF electrodes prepared at different activation potentials is performed. According to the SEM image of the Ni-Co-S/NF obtained at 0.35 V vs. RHE (Fig. 2c), the surface of needle-like nanorods becomes rough, and the tops of the needle-like nanorods interwoven together to form a stable structure, which is different from the initially smooth surface and relatively independent state (Fig. 2a). However, compared with the electrode activated at 0.35 V vs. RHE, the activation degree of the Ni-Co-S/NF obtained at a lower potential of 0.30 V vs. RHE is inadequate according to the almost smooth surface of the needle-like nanorods (Fig. S10a). Meanwhile, the higher activation potential (0.45 V vs. RHE) leads to the remarkable coalescence and fracture of nanorods (Fig. S10b). Therefore, the Ni-Co-S/NF electrode activated at 0.35 V vs. RHE obtains the optimal activation degree as well as high structure stability, and then displays efficient SOR catalytic activity and robust stability (Fig. 3 and S9).

**Table S3.** Comparison of SOR catalytic activity.

| Catalysts                         | Electrolytes                  | Potential (V)<br>@ 100 mA cm <sup>-2</sup> | References |
|-----------------------------------|-------------------------------|--------------------------------------------|------------|
| Co-Ni <sub>3</sub> S <sub>2</sub> | 1 M NaOH+1M Na <sub>2</sub> S | 0.59                                       | 2          |
| Cu <sub>2</sub> S/NF              | 1 M NaOH+1M Na <sub>2</sub> S | 0.44                                       | 3          |
| WS <sub>2</sub> NSs               | 1 M NaOH+1M Na <sub>2</sub> S | ~0.75                                      | 4          |
| CoS <sub>2</sub> @C/MXene/NF      | 1 M NaOH+1M Na <sub>2</sub> S | 0.389                                      | 5          |
| VSe <sub>2</sub>                  | 1 M NaOH+1M Na <sub>2</sub> S | 0.45                                       | 6          |
| Graphite electrode                | 1 M NaOH+1M NaHS+2 M NaClb    | 0.51                                       | 7          |
| Pt disk                           | 1M Na <sub>2</sub> S          | 1.0 (vs SCE)                               | 8          |
| CoNi@NGs                          | 1 M NaOH+1M Na <sub>2</sub> S | 0.52                                       | 9          |
| Ni-Co-S/NF                        | 1 M NaOH+1M Na <sub>2</sub> S | 0.366                                      | This work  |
| Ni-Co-C/NF                        | 1 M NaOH+1M Na <sub>2</sub> S | 0.431                                      | This work  |

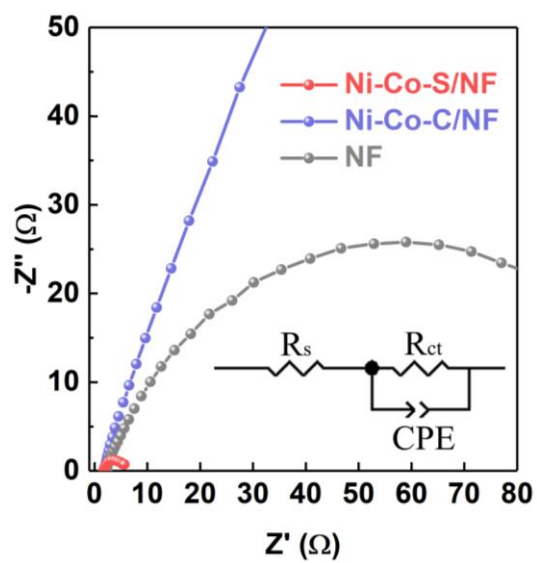

**Fig. 11.** Electrochemical alternating current impedance of the samples at 0.32 V vs. RHE.

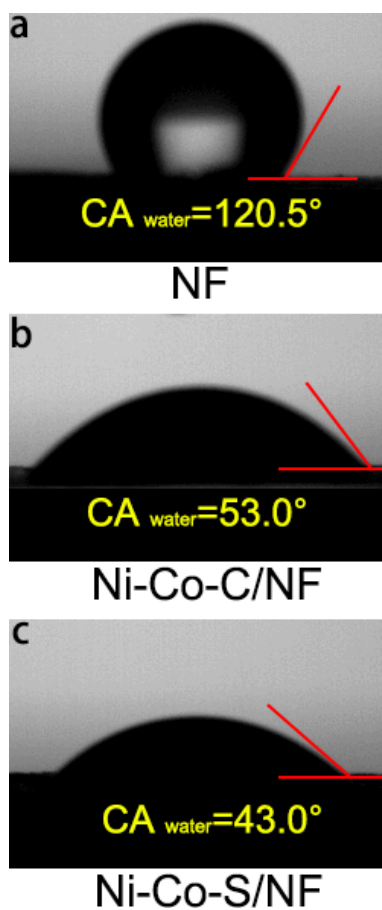

**Fig. S12.** Contact angle of the aqueous droplet on (a) NF, (b) Ni-Co-C/NF and (c) Ni-Co-S/NF, respectively.

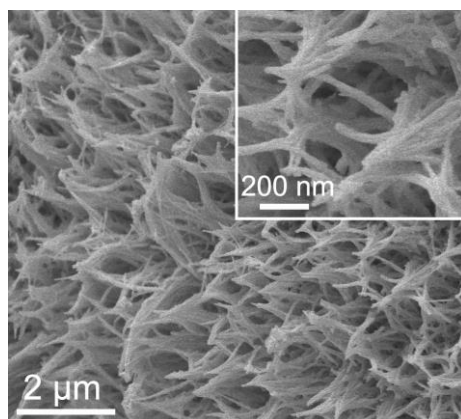

**Fig. S13.** The SEM images of Ni-Co-S/NF-40.

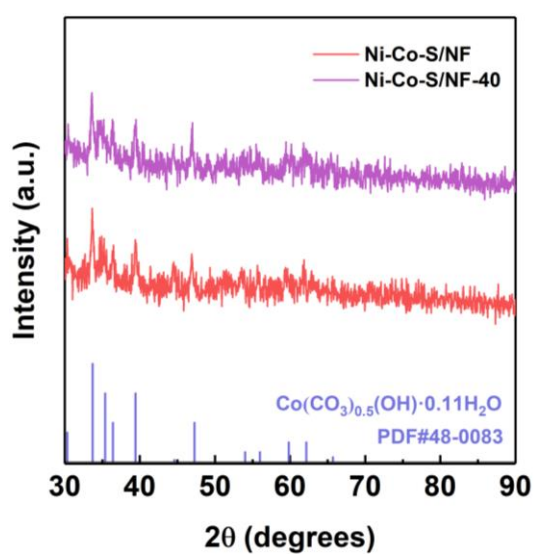

**Fig. S14.** The XRD patterns of Ni-Co-S/NF and Ni-Co-S/NF-40.

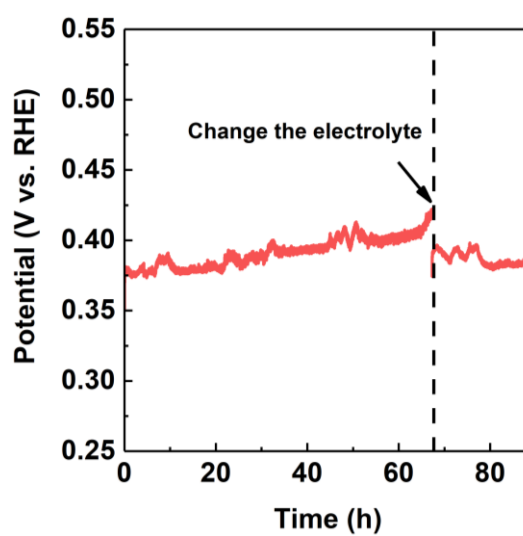

**Fig. S15.** The stability test of Ni-Co-S/NF at the current density of 100 mA cm<sup>-2</sup>.

**Table S4.** Comparison of the electrochemical hydrogen production performance of the two-electrode electrolytic system.

| Catalysts                         | Electrolyte                                                                                                                                                            | Potential (V)<br>@ 100 mA cm <sup>-2</sup> | References |
|-----------------------------------|------------------------------------------------------------------------------------------------------------------------------------------------------------------------|--------------------------------------------|------------|
| Co-Ni <sub>3</sub> S <sub>2</sub> | 1 M NaOH+1M Na <sub>2</sub> S   <br>1 M NaOH+1M Na <sub>2</sub> S                                                                                                      | 0.950                                      | 2          |
| Cu <sub>2</sub> S/NF              | 1 M NaOH+1M Na <sub>2</sub> S   <br>1 M NaOH                                                                                                                           | 0.640                                      | 3          |
| WS <sub>2</sub> NSs               | 1 M NaOH+2 M Na <sub>2</sub> S   <br>2.5 M H <sub>2</sub> SO <sub>4</sub>                                                                                              | ~1.24                                      | 4          |
| CoS <sub>2</sub> @C/MXene/NF      | 1 M NaOH+1M Na <sub>2</sub> S   <br>Sea water                                                                                                                          | ~0.61                                      | 5          |
| CoNiCuMnMo-NPs/CC                 | 0.1M KOH+0.1 M MGLY   <br>0.5 M H <sub>2</sub> SO <sub>4</sub>                                                                                                         | 0.550/-/-                                  | 10         |
| CC@N-CoP                          | 0.96 M FeSO <sub>4</sub> /0.74 M Fe <sub>3</sub> (SO <sub>4</sub> ) <sub>2</sub><br>in 0.5 M H <sub>2</sub> SO <sub>4</sub>   <br>0.5 M H <sub>2</sub> SO <sub>4</sub> | 1.18                                       | 11         |
| Ni-Co-S/NF    Pt-C/CP             | 1 M NaOH+1M Na <sub>2</sub> S   <br>0.5 M H <sub>2</sub> SO <sub>4</sub>                                                                                               | -0.274                                     | This work  |
| Ni-Co-S/NF    Pt-C/CP             | 1 M NaOH+1M Na <sub>2</sub> S   <br>1 M NaOH                                                                                                                           | 0.531                                      | This work  |
| Ni-Co-S/NF    Pt-C/CP             | 1 M NaOH    0.5 M H <sub>2</sub> SO <sub>4</sub>                                                                                                                       | 1.098                                      | This work  |
| Ni-Co-S/NF    Pt-C/CP             | 1 M NaOH    1 M NaOH                                                                                                                                                   | 1.822                                      | This work  |

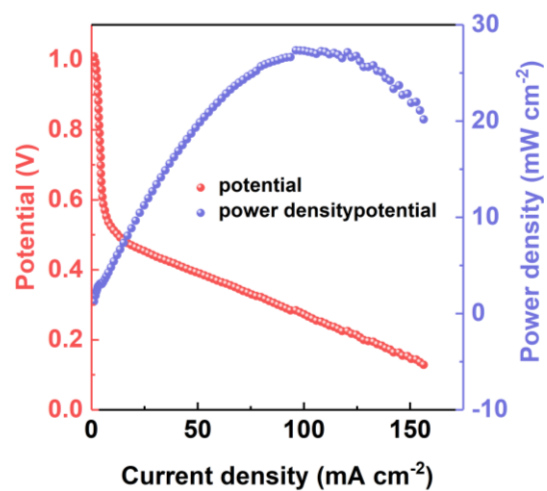

**Fig. S16.** The polarization curve and corresponding power density of the two-electrode system in a dissymmetrical acid (Pt-C/CP for HER)-base (Ni-Co-S/NF for SOR) coupled electrolyzer (this electrolyzer is used as the galvanic cell at the low current density).

The calculation formula is as follows:

1 Kg H<sub>2</sub> is generated, and the required amount of charge (Q) is:

$$Q = (1000g \times N_A \times 2e) / M_{H_2} = (1000 \times 2 \times 6.022 \times 10^{23} \times 1.602 \times 10^{-19}) / 2.016 = 95706785.7 \text{ C}$$

Where  $N_A$  is the Avogadro constant,  $e$  is the charge of an electron and  $M_{H_2}$  is the relative molecular mass of hydrogen (H<sub>2</sub>).

For the HER (pH=14) + OER (pH=14) system, the applied voltages (U1) at a current density of 100 mA cm<sup>-2</sup> is 1.822 V. The amount of electricity (W1) required to obtain 1 Kg H<sub>2</sub> is:

$$W1 = QU1 = 95706785.7 \times 1.822 = 174377763.545 \text{ J} \approx 48.438 \text{ KW} \cdot \text{h}$$

For HER (pH=14) + SOR (pH=14) system, the applied voltages (U2) at the current density of 100 mA cm<sup>-2</sup> is 0.531 V.

The amount of electricity (W2) required to obtain 1 Kg H<sub>2</sub> is:

$$W2 = QU2 = 95706785.7 \times 0.531 = 50820303.207 \text{ J} \approx 14.117 \text{ KW} \cdot \text{h}$$

For HER (pH=0)+OER (pH=14) system, the applied voltages (U3) at the current density of 100 mA cm<sup>-2</sup> is 1.098 V.

The amount of electricity (W3) required to obtain 1 Kg H<sub>2</sub> is:

$$W3 = QU3 = 95706785.7 \times 1.098 = 105086050.698 \text{ J} \approx 29.191 \text{ KW} \cdot \text{h}$$

For HER (pH=0)+SOR (pH=14) system, the applied voltages (U4) at the current density of 100 mA cm<sup>-2</sup> is -0.274 V.

The amount of electricity (W3) required to obtain 1 Kg H<sub>2</sub> is:

$$W4 = QU4 = 95706785.7 \times (-0.274) = -26223.659.282 \text{ J} \approx -7.284 \text{ KW} \cdot \text{h}$$

**Table S5.** The energy consumption of different systems to obtain 1 Kg H<sub>2</sub> of different electrolytes in this work.

| Catalytic electrodes         | Voltage (V)<br>@ 100 mA cm <sup>-2</sup> | The amount of electricity<br>(KW·h)<br>@ 100 mA cm <sup>-2</sup> |
|------------------------------|------------------------------------------|------------------------------------------------------------------|
| HER (pH=14) +<br>OER (pH=14) | 1.822                                    | 48.438                                                           |
| HER (pH=14) +<br>SOR (pH=14) | 0.531                                    | 14.117                                                           |
| HER (pH=0) +<br>OER (pH=14)  | 1.098                                    | 29.191                                                           |
| HER (pH=0) +<br>SOR (pH=14)  | -0.274 ( discharge )                     | -7.284 ( discharge )                                             |

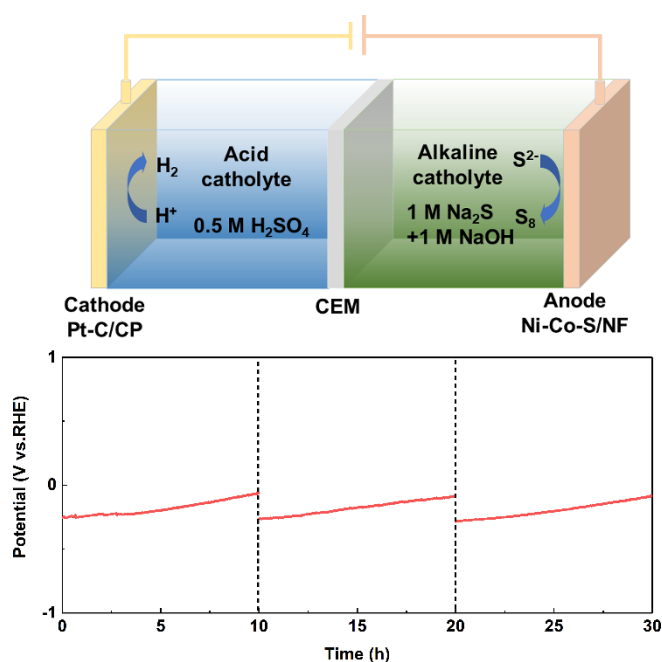

**Fig. S17.** (a) the schematic of the electrolyzer and (b) Stability test for the dissymmetrical acid (Pt-C/CP for HER)-base (Ni-Co-S/NF for SOR) coupled system.

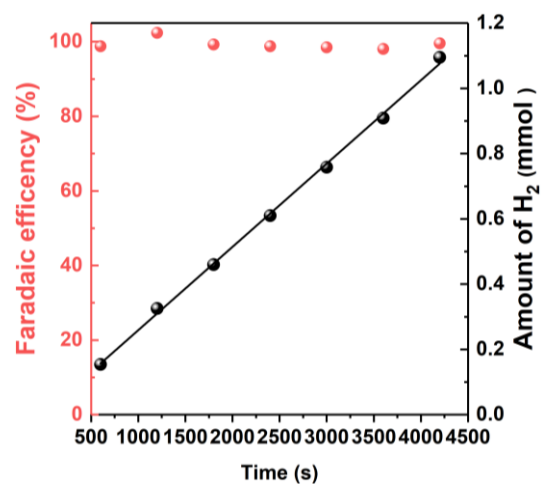

**Fig. S18.** The Faraday efficiency test for H<sub>2</sub> in the dissymmetrical coupled system based SOR.

Calculation of Faradic efficiency for sulfur: The electrolyte after the electrolysis process is acidified by adding sulfuric acid (the pH value of the electrolyte was adjusted to about 1 to form colloidal sulfur based on equation (1)), centrifuged, washed, dried and then weighed to obtain the weight of the sulfur product. According to equations (1) and (2),  $S^{2-}$  is converted into polysulfide ( $S_x^{2-}$ ) and finally sulfur is formed. No matter what the value of x, the number of transferred electrons (n) in the whole SOR process from  $S^{2-}$  to S is 2.

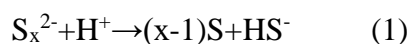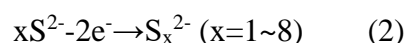

The Faradaic efficiency can be obtained based on the following equations (3) - (5).

$$Q = j \times t \quad (3)$$

$$m_{\text{theory}} = \frac{Q \times M_S}{n \times F} \quad (4)$$

$$\text{Faradaic efficiency}(\%) = \frac{m_s}{m_{\text{theory}}} \times 100\% \quad (5)$$

Where Q is the total quantity of electric charge consumed;  $M_S$  is the relative molecular weight of S (32); n is the number of transferred electrons in the whole SOR process from  $S^{2-}$  to S; F, j and t are the Faraday constant ( $96485 \text{ C mol}^{-1}$ ), the current density and reaction time, respectively;  $m_s$  and  $m_{\text{theory}}$  are the practice and theory weight of generated sulfur.

**Table S6.** Yield of sulfur powder and the faradaic efficiency of SOR.

| Time (h) | Practical sulfur powder<br>yield (g) | Theoretical sulfur<br>powder yield (g) | Faradaic efficiency of<br>SOR (%) |
|----------|--------------------------------------|----------------------------------------|-----------------------------------|
| 0        | 0                                    | 0                                      | 0                                 |
| 20       | 0.568                                | 0.597                                  | 95.1                              |
| 40       | 1.163                                | 1.195                                  | 97.3                              |
| 60       | 1.751                                | 1.792                                  | 97.7                              |

## References

1. Liu, Y.; Jiang, Y.; Hu, Z.; Peng, J.; Lai, W.; Wu, D.; Zuo, S.; Zhang, J.; Chen, B.; Dai, Z.; Yang, Y.; Huang, Y.; Zhang, W.; Zhao, W.; Zhang, W.; Wang, L.; Chou, S., In-Situ Electrochemically Activated Surface Vanadium Valence in V<sub>2</sub>C MXene to Achieve High Capacity and Superior Rate Performance for Zn-Ion Batteries. *Advanced Functional Materials* **2021**, *31* (8), 2008033.
2. Li, Y.; Duan, Y.; Zhang, K.; Yu, W., Efficient anodic chemical conversion to boost hydrogen evolution with low energy consumption over cobalt-doped nickel sulfide electrocatalyst. *Chemical Engineering Journal* **2022**, *433*, 134472.
3. Pei, Y.; Cheng, J.; Zhong, H.; Pi, Z.; Zhao, Y.; Jin, F., Sulfide-oxidation-assisted electrochemical water splitting for H<sub>2</sub> production on a bifunctional Cu<sub>2</sub>S/nickel foam catalyst. *Green Chemistry* **2021**, *23* (18), 6975-6983.
4. Yi, L.; Ji, Y.; Shao, P.; Chen, J.; Li, J.; Li, H.; Chen, K.; Peng, X.; Wen, Z., Scalable Synthesis of Tungsten Disulfide Nanosheets for Alkali-Acid Electrocatalytic Sulfion Recycling and H<sub>2</sub> Generation. *Angewandte Chemie International Edition* **2021**, *60* (39), 21550-21557.
5. Zhang, L.; Wang, Z.; Qiu, J., Energy-Saving Hydrogen Production by Seawater Electrolysis Coupling Sulfion Degradation. *Advanced Materials* **2022**, *34* (16), 2109321.
6. Feng, W.; Cheng, M.; Du, R.; Wang, Y.; Wang, P.; Li, H.; Song, L.; Wen, X.; Yang, J.; Li, X.; He, J.; Shi, J., Gram-Scale Synthesized Two-Dimensional VSe<sub>2</sub> and SnSe<sub>2</sub> for Ultrahigh Electrocatalytic Sulfion Recycling. *Advanced Materials Interfaces* **2022**, *9* (13), 2200060.
7. Petrov, K.; Srinivasan, S., Low temperature removal of hydrogen sulfide from sour gas and its utilization for hydrogen and sulfur production. *International Journal of Hydrogen Energy* **1996**, *21* (3), 163-169.
8. Zhao, Y.; Wang, S.; Varela, H.; Gao, Q.; Hu, X.; Yang, J.; Epstein, I. R., Spatiotemporal Pattern Formation in the Oscillatory Electro-Oxidation of Sulfide on a Platinum Disk. *The Journal of Physical Chemistry C* **2011**, *115* (26), 12965-12971.
9. Zhang, M.; Guan, J.; Tu, Y.; Chen, S.; Wang, Y.; Wang, S.; Yu, L.; Ma, C.; Deng, D.; Bao, X., Highly efficient H<sub>2</sub> production from H<sub>2</sub>S via a robust graphene-encapsulated metal catalyst. *Energy & Environmental Science* **2020**, *13* (1), 119-126.
10. Fan, L.; Ji, Y.; Wang, G.; Chen, J.; Chen, K.; Liu, X.; Wen, Z., High Entropy Alloy Electrocatalytic Electrode toward Alkaline Glycerol Valorization Coupling with Acidic Hydrogen Production. *Journal of the American Chemical Society* **2022**, *144* (16), 7224-7235.
11. Zhou, Q.; Shen, Z.; Zhu, C.; Li, J.; Ding, Z.; Wang, P.; Pan, F.; Zhang, Z.; Ma, H.; Wang, S.; Zhang, H., Nitrogen-Doped CoP Electrocatalysts for Coupled Hydrogen Evolution and Sulfur Generation with Low Energy Consumption. *Advanced Materials* **2018**, *30* (27), 1800140.
